# Supplementary material for: GAA compound heterozygous mutations associated with autophagic impairment cause cerebral infarction in Pompe disease
Source: publisher site journal article supplement (doi:10.18632/aging.102879), 2020-03-03
Supplement: Supplementary file [file aging-v12i5-102879-supplementary-material-SD1.pdf]

## SUPPLEMENTARY TABLES

**Supplementary Table 1. Highly frequent SNPs associated with ischemic and hemorrhagic stroke are not differentially examined in the Pompe patients and their family members.**

| Gene        | Lead-SNP   | Chromosome | Position  | Allele | Pompe patients | Normal members |
|-------------|------------|------------|-----------|--------|----------------|----------------|
| ABO         | rs505922   | 9          | 136149229 | T>C    | 2/2            | 5/6            |
| APOE        | rs429358   | 19         | 45411941  | T>C    | 0/2            | 0/6            |
| AQP9        | rs4471613  | 15         | 58551694  | G>A    | 0/2            | 0/6            |
| CDC5L       | rs556621   | 6          | 44594159  | T>G    | 2/2            | 4/6            |
| FOXF2       | rs12204590 | 6          | 1337393   | T>A    | 0/2            | 0/6            |
| HABP2       | rs11196288 | 10         | 115057443 | A>G    | 2/2            | 6/6            |
| HDAC9       | rs2107595  | 7          | 19049388  | G>A    | 2/2            | 5/6            |
| MMP12       | rs660599   | 11         | 102729757 | G>A    | 0/2            | 0/6            |
| NINJ2       | rs11833579 | 12         | 775199    | G>A    | 1/2            | 5/6            |
| PITX2       | rs6843082  | 4          | 111718067 | G>A    | 0/2            | 2/6            |
| PMF1        | rs2984613  | 1          | 156197380 | C>T    | 2/2            | 5/6            |
| PRKCH       | rs2230500  | 14         | 61924239  | G>A    | 0/2            | 1/6            |
| SH2B3/ALDH2 | rs10744777 | 12         | 112233018 | T>C    | 2/2            | 6/6            |
| TSPAN2      | rs12122341 | 1          | 115655690 | C>G    | 0/2            | 0/6            |
| ZFX3        | rs879324   | 16         | 73068678  | G>A    | 0/2            | 1/6            |

The frequency of these SNPs were identified from several independent big cohorts in the review article [20].

**Supplementary Table 2. Common autophagy-related gene SNPs associated with cardiovascular diseases are not differentially examined in the Pompe patients and their family members.**

| Gene     | Lead-SNP   | chromosome | Position | Allele | Pompe patients | Normal members |
|----------|------------|------------|----------|--------|----------------|----------------|
| ATG7     | rs2447607  | chr3       | 11552027 | C>T    | 2/2            | 6/6            |
| ATG4D    | rs7255312  | chr19      | 10663165 | C>T    | 2/2            | 3/6            |
| ATG4C    | rs6587988  | chr1       | 63252766 | C>T    | 0/2            | 0/6            |
| AMBRA1   | rs11038913 | chr11      | 46559730 | T>C    | 0/2            | 0/6            |
| ATG13    | rs8914     | chr11      | 46699124 | G>A    | 0/2            | 0/6            |
| ATG16L1  | rs4944804  | chr11      | 72520530 | C>A    | 0/2            | 0/6            |
| MAP1LC3A | rs6088521  | chr20      | 33133184 | A>C    | 0/2            | 1/6            |

The frequency of these SNPs were identified in the research article [21].
